# Supplementary material for: Molecular, Crystalline, and Microstructures of Lipids from Astrocaryum Species in Guyana and Their Thermal and Flow Behavior
Source: MDPI journal article supplement (doi:10.3390/thermo4010009), 2024-03-12
Supplement: s1 [file s1]

## Supporting Information

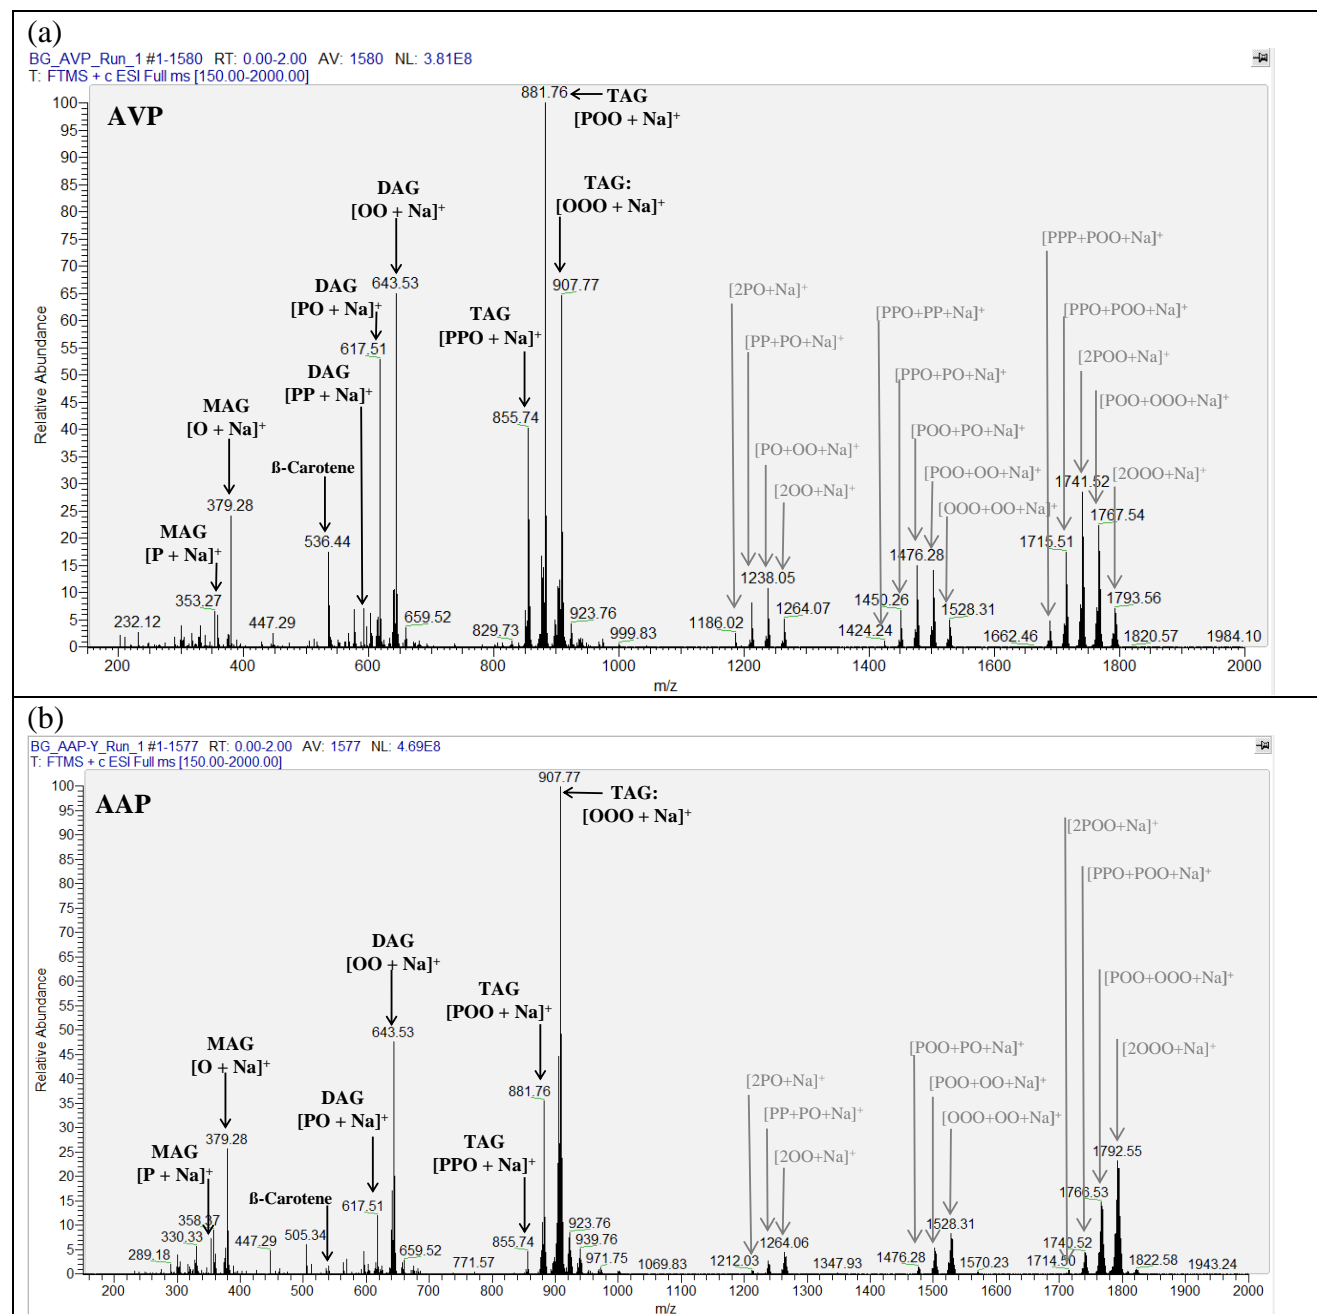

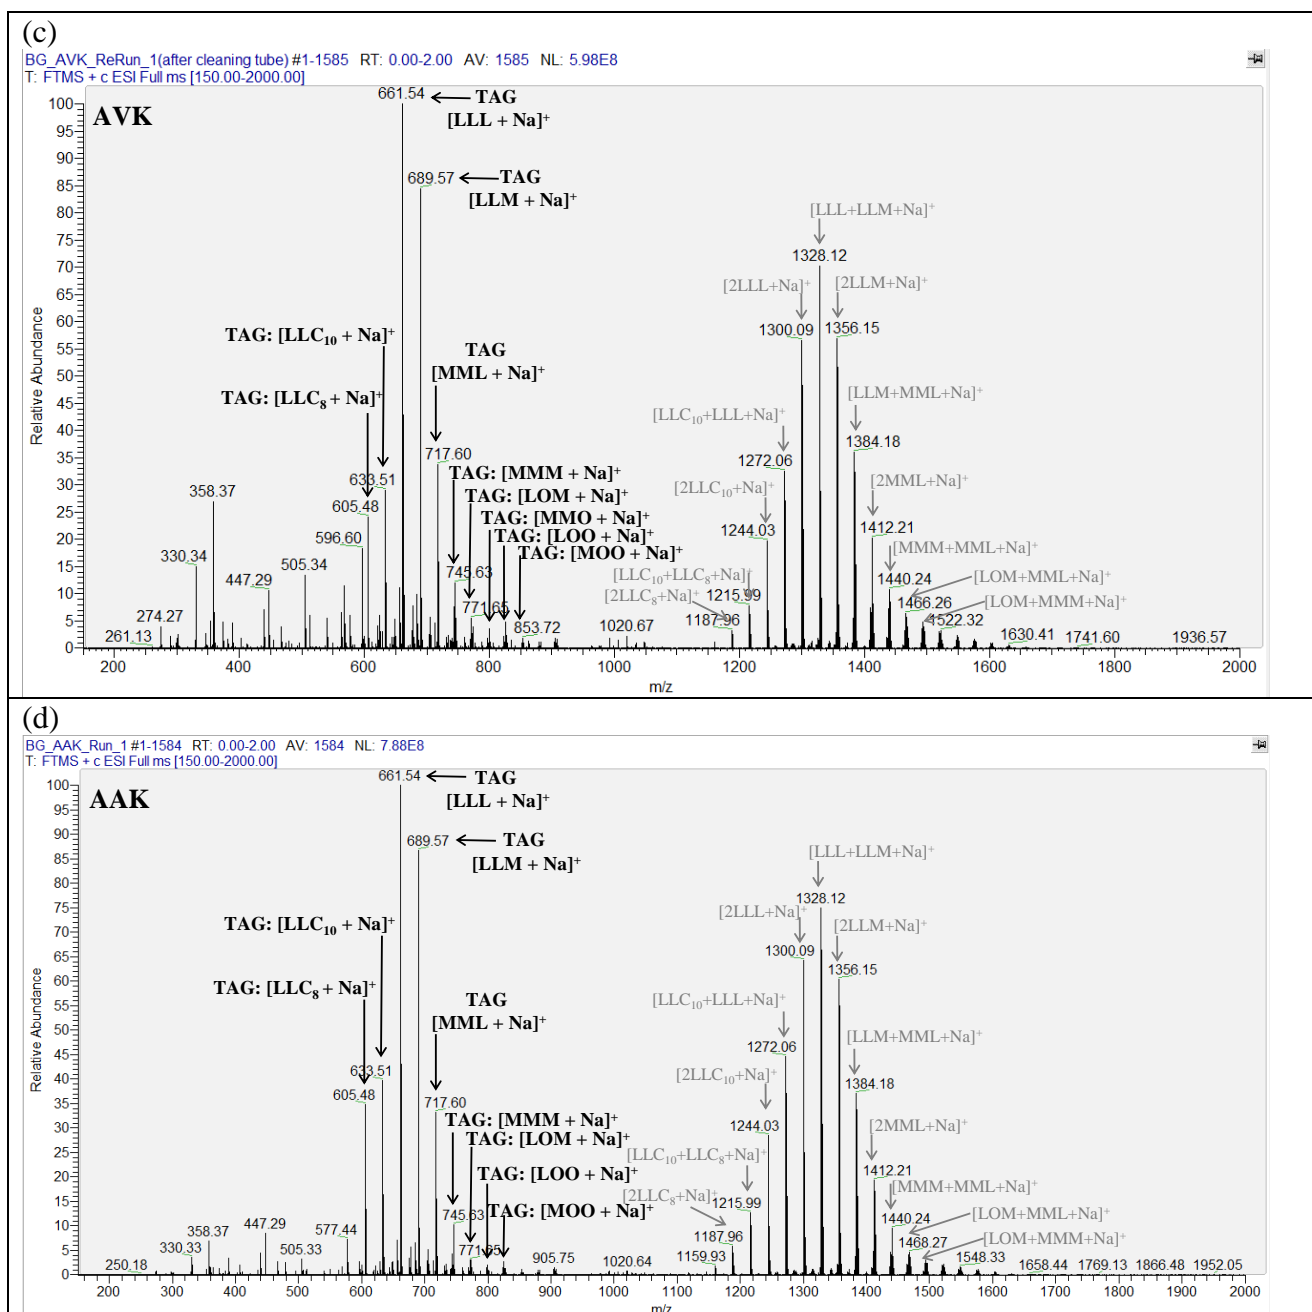

**Figure S1.** Full-scan ESI-MS from 150 to 2000  $m/z$  for (a) *Astrocyrium vulgare* pulp oil, (b) *Astrocyrium Aculeatum* pulp oil, (c) *Astrocyrium vulgare* kernel oil and (d) *Astrocyrium Aculeatum* kernel oil. Major peaks are labeled with the identified molecule adducts.

**Table S1:** Shear rate vs. shear stress data for AVK and AAK

| <b>Parameters</b>            | <b>30°C</b> |            | <b>40°C</b> |            | <b>60°C</b> |            | <b>90°C</b> |            |
|------------------------------|-------------|------------|-------------|------------|-------------|------------|-------------|------------|
|                              | <b>AVK</b>  | <b>AAK</b> | <b>AVK</b>  | <b>AAK</b> | <b>AVK</b>  | <b>AAK</b> | <b>AVK</b>  | <b>AAK</b> |
| $\tau_0$                     | 0.71        | 0.10       | 0.02        | -0.01      | 0.01        | -0.01      | 0.16        | 0.02       |
| $\kappa$                     | 21.40       | 31.08      | 32.88       | 29.54      | 17.13       | 15.98      | 7.34        | 8.28       |
| $n$                          | 1.10        | 1.05       | 0.99        | 0.99       | 0.99        | 1.00.      | 1.02        | 1.00       |
| Viscosity ( $\eta$ ) (mPa.S) | 21.41       | 31.16      | 28.29       | 29.36      | 15.06       | 15.82      | 7.35        | 8.07       |

**Table S2:** Shear rate vs. shear stress data for AVP and AAP

| <b>Parameters</b>            | <b>40°C</b> |            |
|------------------------------|-------------|------------|
|                              | <b>AVP</b>  | <b>AAP</b> |
| $\tau_0$                     | 0.02        | -0.01      |
| $\kappa$                     | 32.88       | 29.54      |
| $n$                          | 0.99        | 0.99       |
| Viscosity ( $\eta$ ) (mPa.S) | 36.35       | 35.03      |

**Table S3:** Subcell units of the polymorphic forms typical of fatty acid derivatives and their associated characteristic Bragg's d-spacing values and Miller indices.

| Polymorph                                                                       | $\beta$ -form |             | $\beta'$ -form |       | $\alpha$ -form |       |
|---------------------------------------------------------------------------------|---------------|-------------|----------------|-------|----------------|-------|
| Subcell                                                                         | triclinic     |             | orthorhombic   |       | hexagonal      |       |
| Characteristic Bragg's $d$ -spacing (Å) and associated Miller indices ( $hkl$ ) | $d$ (Å)       | $hkl$       | $d$ (Å)        | $hkl$ | $d$ (Å)        | $hkl$ |
|                                                                                 | 4.6           | 010         | 4.2            | 110   | 4.2            | 100   |
|                                                                                 | 4.5           | 101         | 3.7            | 200   |                |       |
|                                                                                 | 4.4           | 011         |                |       |                |       |
|                                                                                 | 3.9           | $\bar{1}00$ |                |       |                |       |
|                                                                                 | 3.8           | $\bar{1}00$ |                |       |                |       |
|                                                                                 | 3.7           | 100         |                |       |                |       |
|                                                                                 | 3.5           | 110         |                |       |                |       |
